# Supplementary material for: Climate policy portfolios that accelerate emission reductions
Source: Research Square preprint supplement (doi:10.21203/rs.3.rs-4742975/v1), 2024-08-28
Supplement: Supplementary file 1 [file 49bda1543312b58ebd334db9.xlsx]

## Sheet: Tables ED1-3 models
Table ED1. Replicating Eskander and Fankhauser (2020)			Table ED2. Base models				Table ED3(a). Augmented models						Table ED3(b). Augmented models - robustness checks	robustness check	robustness check	robustness check	robustness check
				(1)	(2)			(1)	(2)	(3)	(4)			(1)	(2)	(3)	(4)
Dependent variable	Log(CO2/GDP)		Dependent variable	Log(CO2/GDP)	Log(CO2/GDP)		Dependent variable	Log(CO2/GDP)	Log(CO2/GDP)	Log(CO2/GDP)	Log(CO2/GDP)		Dependent variable	Log(CO2/GDP)	Log(CO2/GDP)	Log(CO2/GDP)	Log(CO2/GDP)
(L1) Total policy density	-0.000580***		Total policy density	-0.000461**			Total policy density	-0.000567***	-0.000599***	-0.000562***	-0.000476***		Total policy density	-0.000511***	-0.000582***	-0.000405**	-0.000415**
	(0.000223)			(0.000185)				(0.000185)	(0.000183)	(0.000182)	(0.000183)			(0.000187)	(0.000185)	(0.000183)	(0.000182)
(L1) Policy density last 3 years	-0.000998*		Total policy density - Lag 3 years		-0.000532**
	(0.000540)				(0.000219)		HHI - 8 instruments	-0.107***					Shannon - 8 instruments	-0.0583***
								(0.0377)						(0.0179)
							HHI - 3 instruments		-0.0874**				Shannon - 3 instruments		-0.0535**
									(0.0411)						(0.0254)
							HHI sectoral - emissions weighted			-0.252**			Shannon sectoral - emissions weighted			-0.315***
										(0.109)						(0.117)
							HHI sectoral				-0.118**		Shannon sectoral				-0.0654***
											(0.0527)						(0.0244)
(L1) Rule of law	0.0251		Rule of law	-0.00575	0.00908		Rule of law	-0.0236	-0.0238	-0.0170	-0.0263		Rule of law	-0.0228	-0.0242	-0.0264	-0.0208
	(0.0328)			(0.0301)	(0.0330)			(0.0300)	(0.0304)	(0.0305)	(0.0302)			(0.0299)	(0.0305)	(0.0302)	(0.0297)
(L1) Hodrick-Prescott GDP filter	-0.0104		Hodrick-Prescott GDP filter	-0.320	-0.380*		Hodrick-Prescott GDP filter	-0.392*	-0.414*	-0.372*	-0.320		Hodrick-Prescott GDP filter	-0.373*	-0.410*	-0.298	-0.313
	(0.222)			(0.225)	(0.227)			(0.223)	(0.223)	(0.220)	(0.220)			(0.223)	(0.223)	(0.221)	(0.219)
(L1) GDP percap log	2.834***		GDP percap log	2.960***	2.830***		GDP percap log	2.864***	2.892***	2.945***	2.955***		GDP percap log	2.781***	2.890***	2.961***	3.011***
	(0.347)			(0.287)	(0.359)			(0.304)	(0.307)	(0.307)	(0.301)			(0.307)	(0.307)	(0.304)	(0.304)
(L1) GDP percap interaction with square term	-0.153***		GDP percap interaction with square term	-0.163***	-0.154***		GDP percap interaction with square term	-0.156***	-0.158***	-0.160***	-0.161***		GDP percap interaction with square term	-0.152***	-0.158***	-0.162***	-0.165***
	(0.0191)			(0.0161)	(0.0196)			(0.0169)	(0.0171)	(0.0171)	(0.0168)			(0.0171)	(0.0171)	(0.0170)	(0.0170)
(L1) Imports share to GDP	-0.00406***		Imports share to GDP	-0.00313***	-0.00287***		Imports share to GDP	-0.00276***	-0.00276***	-0.00264***	-0.00268***		Imports share to GDP	-0.00277***	-0.00274***	-0.00247***	-0.00253***
	(0.000672)			(0.000712)	(0.000721)			(0.000679)	(0.000683)	(0.000673)	(0.000666)			(0.000671)	(0.000684)	(0.000679)	(0.000675)
(L1) Services share to GDP	-0.00402*		Services share to GDP	-0.00276	-0.00266		Services share to GDP	-0.00211	-0.00221	-0.00206	-0.00205		Services share to GDP	-0.00204	-0.00218	-0.00246	-0.00215
	(0.00230)			(0.00231)	(0.00253)			(0.00225)	(0.00229)	(0.00227)	(0.00224)			(0.00225)	(0.00229)	(0.00224)	(0.00224)
(L1) Temperature variation	-0.00299		Temperature variation	-0.0104	-0.0162**		Temperature variation	-0.0159**	-0.0157**	-0.0152**	-0.0133**		Temperature variation	-0.0160**	-0.0156**	-0.0125*	-0.0132**
	(0.00673)			(0.00662)	(0.00657)			(0.00649)	(0.00653)	(0.00648)	(0.00645)			(0.00651)	(0.00654)	(0.00647)	(0.00644)
Constant	-13.97***		Constant	-14.32***	-14.00***		Constant	-14.03***	-14.18***	-14.50***	-14.46***		Constant	-13.56***	-14.09***	-14.43***	-14.67***
	(1.560)			(1.233)	(1.611)			(1.331)	(1.341)	(1.344)	(1.316)			(1.405)	(1.400)	(1.391)	(1.387)
Observations	730		Observations	813	727		Observations	791	791	795	795		Observations	791	791	795	795
R-squared	0.976		R-squared	0.974	0.976		R-squared	0.976	0.975	0.975	0.975		R-squared	0.976	0.975	0.976	0.976
within R-squared	0.17		within R-squared	0.206	0.177		within R-squared	0.2022	0.1982	0.1915	0.1951		within R-squared	0.204	0.1981	0.1992	0.1982
RMSE	0.078		RMSE	0.081	0.08		RMSE	0.0785	0.0787	0.0788	0.0786		RMSE	0.0784	0.0787	0.0784	0.0785

## Sheet: Tables ED4-5 models
		(4a) in main text	(4a) robustness check	(4b) in main text				(5a) in main text	(5b) in main text	IEA membership model	EU-EFTA membership model
Table ED4. Long-term emission reduction targets	base	absolute target	abs target check	relative target		Table ED5. Governmental organisations	base	energy ministry	CEM	IEA	EU-EFTA
	(1)	(2)	(3)	(4)			(1)	(2)	(3)	(4)	(5)
Dependent variable	Log(CO2/GDP)	Log(CO2/GDP)	Log(CO2/GDP)	Log(CO2/GDP)		Dependent variable	Log(CO2/GDP)	Log(CO2/GDP)	Log(CO2/GDP)	Log(CO2/GDP)	Log(CO2/GDP)
Total policy density	-0.000461**	-0.000119	-0.000534***	-5.33e-05		Total policy density	-0.000461**	-0.000951***	0.000294	0.000129	3.10e-05
	(0.000185)	(0.000198)	(0.000189)	(0.000199)			(0.000185)	(0.000241)	(0.000327)	(0.000407)	(0.000204)
Absolute with 1990 baseline emission targets (dummy)		-0.00445	-0.0644***			Energy ministry (dummy)		-0.0423***
		(0.0220)	(0.0179)					(0.0141)
Total policy density * Absolute with 1990 baseline emission targets		-0.00137***				Total policy density*Energy ministry		0.000788***
		(0.000258)						(0.000195)
Relative emissions targets (dummy)				0.0701**		Clean energy ministerial			0.0966***
				(0.0347)					(0.0191)
Total policy density * Relative emissions targets				-0.00112***		Total policy density*clean energy ministerial			-0.00109***
				(0.000265)					(0.000274)
						IEA (dummy)				-0.0649**
										(0.0289)
						Total policy density*IEA				-0.000757*
										(0.000406)
						EU-EFTA (dummy)					-0.0696***
											(0.0204)
						Total policy density*EU-EFTA					-0.00218***
											(0.000287)
CONTROLS						CONTROLS
Rule of law	-0.00575	-0.00642	-0.00896	-0.000199		Rule of law	-0.00575	-0.0123	-0.0106	-0.00210	-0.00769
	(0.0301)	(0.0297)	(0.0305)	(0.0295)			(0.0301)	(0.0301)	(0.0290)	(0.0301)	(0.0287)
Hodrick-Prescott GDP filter	-0.320	-0.247	-0.291	-0.365		Hodrick-Prescott GDP filter	-0.320	-0.345	-0.422*	-0.361	-0.269
	(0.225)	(0.219)	(0.223)	(0.225)			(0.225)	(0.222)	(0.226)	(0.226)	(0.217)
GDP percap log	2.960***	2.650***	2.837***	3.095***		GDP percap log	2.960***	2.824***	2.863***	2.417***	2.463***
	(0.287)	(0.274)	(0.298)	(0.321)			(0.287)	(0.290)	(0.291)	(0.342)	(0.280)
GDP percap interaction with square term	-0.163***	-0.150***	-0.157***	-0.169***		GDP percap interaction with square term	-0.163***	-0.155***	-0.158***	-0.136***	-0.140***
	(0.0161)	(0.0153)	(0.0166)	(0.0175)			(0.0161)	(0.0162)	(0.0163)	(0.0184)	(0.0157)
Imports share to GDP	-0.00313***	-0.00272***	-0.00316***	-0.00290***		Imports share to GDP	-0.00313***	-0.00304***	-0.00288***	-0.00286***	-0.00161**
	(0.000712)	(0.000697)	(0.000713)	(0.000709)			(0.000712)	(0.000706)	(0.000710)	(0.000695)	(0.000677)
Services share to GDP	-0.00276	-0.00338	-0.00253	-0.00183		Services share to GDP	-0.00276	-0.000728	-0.00359*	-0.00417*	-0.00383*
	(0.00231)	(0.00225)	(0.00232)	(0.00223)			(0.00231)	(0.00240)	(0.00218)	(0.00234)	(0.00228)
Temperature variation	-0.0104	-0.0123*	-0.0138**	-0.0101		Temperature variation	-0.0104	-0.00950	-0.00683	-0.00879	-0.0142**
	(0.00662)	(0.00636)	(0.00642)	(0.00660)			(0.00662)	(0.00665)	(0.00651)	(0.00650)	(0.00630)
Constant	-14.32***	-12.47***	-13.71***	-15.21***		Constant	-14.32***	-13.91***	-13.89***	-11.52***	-13.89***
	(1.233)	(1.186)	(1.294)	(1.449)			(1.233)	(1.246)	(1.261)	(1.583)	(1.261)
Observations	813	813	813	813		Observations	813	813	813	813	813
R-squared	0.974	0.975	0.975	0.975		R-squared	0.973	0.975	0.975	0.975	0.975
F test (for dummy and interaction term)		19.73	0	10.79		F test (for dummy and interaction term)		8.27	12.86	5.12	37.06
F test P value		0	0	0		F test P value		0.0003	0	0.0062	0
within R-squared	0.1974	0.245	0.2172	0.2186		within R-squared	0.1974	0.2211	0.2343	0.2257	0.2888
RMSE	0.0828	0.079	0.0804	0.0804		RMSE	0.0828	0.0802	0.0795	0.08	0.0767

## Sheet: Tables ED6-8 models
Table ED6. Including pre-2000 policies in total policy density variable.	including pre-2000 policies		Table ED7. Excluding China	base	excluding China		Table ED8. Independent variables are lagged by one year.	one year lagged
	(1)			(1)	(2)			(1)
Dependent variable	LOG(CO2/GDP)		Dependent variable	Log(CO2/GDP)	Log(CO2/GDP)		Dependent variable	LOG(CO2/GDP)
Total policy density including policies introduced before 2000	-0.000461**		Total policy density	-0.000461**	-0.000451**		(L1) Total policy density	-0.000567***
	(0.000185)			(0.000185)	(0.000188)			(0.000201)
CONTROLS			CONTROLS				CONTROLS
Rule of law	-0.00575		Rule of law	-0.00575	-0.00102		(L1) Rule of law	0.0113
	(0.0301)			(0.0301)	(0.0302)			(0.0317)
Hodrick-Prescott GDP filter	-0.320		Hodrick-Prescott GDP filter	-0.320	-0.336		(L1) Hodrick-Prescott GDP filter	0.0480
	(0.225)			(0.225)	(0.225)			(0.224)
GDP percap log	2.960***		GDP percap log	2.960***	2.833***		(L1) GDP percap log	2.817***
	(0.287)			(0.287)	(0.279)			(0.310)
GDP percap interaction with square term	-0.163***		GDP percap interaction with square term	-0.163***	-0.156***		(L1) GDP percap interaction with square term	-0.155***
	(0.0161)			(0.0161)	(0.0158)			(0.0176)
Imports share to GDP	-0.00313***		Imports share to GDP	-0.00313***	-0.00306***		(L1) Imports share to GDP	-0.00414***
	(0.000712)			(0.000712)	(0.000716)			(0.000688)
Services share to GDP	-0.00276		Services share to GDP	-0.00276	-0.00193		(L1) Services share to GDP	-0.00440**
	(0.00231)			(0.00231)	(0.00230)			(0.00224)
Temperature variation	-0.0104		Temperature variation	-0.0104	-0.0125*		(L1) Temperature variation	0.00199
	(0.00662)			(0.00662)	(0.00657)			(0.00667)
Constant	-14.31***		Constant	-14.32***	-13.84***		Constant	-13.59***
	(1.234)			(1.233)	(1.195)			(1.331)
Observations	813		Observations	813	794		Observations	773
R-squared	0.974		R-squared	0.974	0.971		R-squared	0.975
within R-squared	0.2058		within R-squared	0.2058	0.1975		within R-squared	0.1874
RMSE	0.0809		RMSE	0.0809	0.0809		RMSE	0.0803

## Sheet: Table ED9 country stats
	Average (2000-2019)		% reduction (2000-2019)	Total number of policies in 2019			Government and institutional dummies in 2019						Terciles
	Absolute emissions, fossil CO2 (kt)	Emission intensity (CO2/GDP)	Emission intensity (CO2/GDP)	Total policy density	Instrument HHI	Weighted sectoral HHI	Absolute emission target	Energy ministry	Independent body		Selected countries for vignettes	∆CO2/GDP	Policy density	Instrument specialisation	Sectoral specialisation
China	7058709	0.619	-0.385714	210	0.346558	0.0642708	0	0	0		China	-0.385714	H	L	H
United States of America	5277652	0.325	-0.428571	178	0.343485	0.0410925	1	1	0		United States of America	-0.428571	H	L	L
India	1544338	0.295	-0.242424	117	0.339848	0.0314897	0	1	0			-0.242424	H	L	L
Russia	1531436	0.5115	-0.39726	32	0.344991	0.0691916	1	1	0			-0.39726	L	L	H
Japan	1155131	0.232	-0.2	77	0.337166	0.0390308	1	0	0			-0.2	H	L	L
Germany	758863	0.211	-0.36	152	0.337535	0.0479447	1	1	1			-0.36	H	L	M
Canada	537671	0.374	-0.214286	123	0.337792	0.0542912	1	0	0			-0.214286	H	L	H
Korea	520126	0.3295	-0.341463	57	0.334877	0.0413569	0	1	0			-0.341463	M	L	L
United Kingdom	462735	0.1845	-0.5	118	0.365596	0.0522068	1	1	1		United Kingdom	-0.5	H	M	M
Mexico	421076	0.215	-0.181818	111	0.416351	0.0294076	0	1	0		Mexico	-0.181818	H	H	L
South Africa	392976	0.655	-0.031746	59	0.371226	0.048938	0	1	0			-0.031746	M	M	M
Indonesia	391594	0.1945	-0.142857	74	0.336324	0.0352071	0	1	0		Indonesia	-0.142857	M	L	L
Italy	386523	0.167	-0.31579	79	0.405972	0.0492051	1	0	0			-0.31579	H	H	M
Brazil	370936	0.1405	-0.0666667	46	0.37415	0.0448223	0	1	0		Brazil	-0.0666667	M	M	M
Australia	370795	0.3865	-0.304348	167	0.351725	0.0348988	1	1	1			-0.304348	H	M	L
France	337677	0.131	-0.375	94	0.381248	0.0505513	1	1	1			-0.375	H	M	M
Poland	295351	0.3595	-0.5	44	0.367985	0.0524022	1	1	0			-0.5	M	M	H
Spain	276585	0.176	-0.380952	132	0.353356	0.0519548	1	1	0			-0.380952	H	M	M
Turkey	272818	0.1805	-0.238095	36	0.34281	0.0469393	0	1	0			-0.238095	L	L	M
Netherlands	160871	0.2	-0.304348	84	0.380385	0.0427712	1	0	0			-0.304348	H	M	L
Czech Republic	109850	0.354	-0.54902	25	0.396462	0.055765	1	0	0			-0.54902	L	H	H
Belgium	100241	0.211	-0.428571	31	0.335277	0.0432423	1	1	0			-0.428571	L	L	M
Greece	80663.2	0.247	-0.366667	30	0.437212	0.0509233	1	1	0			-0.366667	L	H	M
Chile	67791.3	0.203	-0.0454546	32	0.35627	0.0757348	0	1	0			-0.0454546	L	M	H
Austria	66200.8	0.164	-0.222222	56	0.349923	0.0377847	1	0	0			-0.222222	M	M	L
Israel	62663.5	0.261	-0.4	15	0.448889	0.0715985	0	1	0		Israel	-0.4	L	H	H
Colombia	61451.6	0.126	-0.3125	31	0.352099	0.0476462	0	1	0			-0.3125	L	M	M
Finland	54356.2	0.241	-0.428571	52	0.419983	0.0510629	1	1	1			-0.428571	M	H	M
Portugal	51571.6	0.165	-0.368421	93	0.523343	0.0576662	1	0	0			-0.368421	H	H	H
Hungary	48678	0.203	-0.464286	46	0.422198	0.0488546	1	0	0			-0.464286	M	H	M
Sweden	43898.5	0.1065	-0.6	68	0.395556	0.0659785	1	0	1			-0.6	M	M	H
Denmark	43752.5	0.167	-0.571429	44	0.34754	0.0387113	1	1	1			-0.571429	M	L	L
Switzerland	40731.6	0.0845	-0.4	35	0.390531	0.0549448	1	1	0			-0.4	L	M	H
Ireland	39185.8	0.161	-0.652174	80	0.400807	0.0603924	1	0	1			-0.652174	H	H	H
Norway	35972.7	0.126	-0.153846	39	0.49426	0.0260777	1	1	1		Norway	-0.153846	M	H	L
Slovak Republic	33759.7	0.2635	-0.619048	45	0.339286	0.0400779	1	0	0			-0.619048	M	L	L
New Zealand	31652.3	0.2135	-0.346154	54	0.335467	0.0506396	1	0	1			-0.346154	M	L	M
Estonia	16180.3	0.475	-0.66129	35	0.613573	0.0693191	1	0	0		Estonia	-0.66129	L	H	H
Slovenia	14613.3	0.2395	-0.413793	9	0.455621	0.0729807	1	0	0			-0.413793	L	H	H
Lithuania	11362	0.1645	-0.478261	20	0.455621	0.0266176	1	1	0			-0.478261	L	H	L
Luxembourg	9798.76	0.196	-0.333333	38	0.364583	0.0390391	1	1	0			-0.333333	M	M	L
Latvia	7299.41	0.1715	-0.458333	19	0.619377	0.0661603	1	0	0			-0.458333	L	H	H
Iceland	2020.77	0.142	-0.55	4	1	0.155073	1	0	0			-0.55	L	H	H
Notes: Countries are presented in diminishing order of average absolute emissions for 2000-2019. Higher value for the Herfindahl-Hirschman Index (HHI) indicates higher specialisation, the opposite for lower value. We report the total number of policies (total policy density, HHI) and government and institutional dummies (all three types) in 2019, as we use the cumulative number of polices in our …
SUMMARY DESCRIPTIVES
MEAN	547850	0.245872	-0.365924	67.2326	0.405192	0.0519596	0.744186	0.604651	0.232558
STDEV	1.32323e+06	0.12813	0.156822	48.0599	0.11502	0.0204141	0.441481	0.494712	0.427463
MIN	2020.77	0.0845	-0.66129	4	0.334877	0.0260777	0	0	0
MAX	7058709	0.655	-0.031746	210	1	0.155073	1	1	1
for country vignettes
MIN	2020.77	0.0845	-0.66129	4	0.334877	0.0260777
TERCILE 1	51571.6	0.176	-0.428571	38	0.349923	0.0432423
TERCILE 2	370795	0.241	-0.31579	77	0.396462	0.0524022
TERCILE 3	7058709	0.655	-0.031746	210	1	0.155073
MAX	7058709	0.655	-0.031746	210	1	0.155073

## Sheet: Table ED10 model descriptives
Dependent variable	Obs	Mean	Std. dev.	Min	Max	Variable
CO2/GDP (kgCO2 per 2015 USD PPP)	860	0.245239	0.134326	0.0603937	0.76032	CO2GDPPP
Log(CO2/GDP)	860	-1.52809	0.481997	-2.80687	-0.274016	CO2GDPPP_ln
Independent variables
Cummulative policy density	860	32.5988	35.2135	0	210	pol_dens_cum
Policy instrument type diversity (Herfindhal-Hirschman index 3 types)	834	0.431082	0.148813	0.333333	1	HHI_upd
Policy sectoral coverage diversity (Herfindhal-Hirschman index CO2 emissions weighted)	838	0.0634198	0.0437347	0.000914	0.536554	HHI_wght_s~t
Policy instrument type diversity (Herfindhal-Hirschman index 8 types)	834	0.326305	0.164681	0.185185	1	HHI
Policy sectoral coverage diversity (Herfindhal-Hirschman index unweighted)	838	0.305859	0.121718	0.2	1	HHI_sect
Energy ministry (dummy variable)	860	0.0860465	0.280596	0	1	ministry_c~e
Clean Energy Ministerial (dummy variable)	860	0.252326	0.4346	0	1	clean_en_min
Absolute 1990 target (dummy variable)	860	0.624419	0.484554	0	1	targ~2_ratif
Relative target (dummy variable)	860	0.0476744	0.2132	0	1	targ~5_ratif
Controls
Rule of law (World Bank indicator)	817	1.00541	0.830598	-1.09756	2.12967	Ruleoflaw
Hodrick-Prescott GDP filter (using GDP PPP per2015 USD)	860	6.07e-13	0.0170904	-0.0952657	0.105478	hp_GDPPP
GDP per capita (constant 2017 international $)	860	36321.1	19173.4	2578.59	114889
Log(GDP per capita)	860	10.3304	0.649029	7.855	11.6517	gdp_pc_ppp~n
GDP per capita interaction with squared term	860	107.138	12.9457	61.701	135.763	c.gdp_pc_ppp_ln##c.gdp_pc_ppp_ln
Imports of goods and services (% of GDP)	860	42.4786	25.7031	9.19517	187.165	imp_sh
Services, value added (% of GDP)	856	60.8488	7.71184	33.3686	79.332	srv_sh
Temperature variation (annual difference from long-term average)	860	0.162271	0.499287	-1.93933	1.61533	temp_var

## Sheet: Table ED11 country shares
	Average (2000-2019) - share of sectoral CO2 emissions to total CO2 emissions						Share of policies per type of instrument to total stock of policies in 2019			Share of policies per sector to total stock of policies in 2019
country	Electricity and heating	Energy industry	Agricultural	Buildings	Manufacturing and construction	Transport	Regulatory	Market-based	Soft	Electricity and heating	Energy industry	Agricultural	Buildings	Manufacturing and construction	Transport
China	0.488526	0.0840089	0.0102948	0.04621	0.279155	0.0918052	0.398438	0.359375	0.242188	0.332226	0.259136	0.00332226	0.212625	0.0598007	0.13289
United States of America	0.346943	0.069121	0.00826054	0.116049	0.0892267	0.3704	0.280374	0.41433	0.305296	0.151394	0.175299	0	0.390438	0.0996016	0.183267
India	0.438505	0.108072	0.0149463	0.0537752	0.249334	0.135367	0.336788	0.274611	0.388601	0.187919	0.161074	0.0268456	0.409396	0.0939597	0.120805
Russia	0.31714	0.219916	0.00846731	0.134402	0.163946	0.156129	0.413043	0.326087	0.26087	0.125	0.1	0	0.675	0.05	0.05
Japan	0.415496	0.100545	0.0103128	0.103583	0.179156	0.190906	0.330097	0.378641	0.291262	0.166667	0.135417	0	0.375	0.104167	0.21875
Germany	0.313992	0.0935479	0.0109333	0.187965	0.144416	0.249146	0.333333	0.379167	0.2875	0.140097	0.135266	0.00483092	0.396135	0.154589	0.169082
Canada	0.120634	0.263592	0.031212	0.138567	0.110596	0.335398	0.329843	0.382199	0.287958	0.0915033	0.0588235	0	0.431373	0.150327	0.267974
Korea	0.464467	0.152368	0.00648093	0.0817927	0.112413	0.182478	0.305556	0.333333	0.361111	0.205479	0.123288	0	0.356164	0.109589	0.205479
United Kingdom	0.148488	0.142146	0.00826628	0.258535	0.0933157	0.349249	0.3	0.473684	0.226316	0.179641	0.203593	0	0.275449	0.0958084	0.245509
Mexico	0.273811	0.173237	0.0226939	0.0482572	0.130817	0.351184	0.552239	0.298507	0.149254	0.212329	0.164384	0.00684931	0.438356	0.116438	0.0616438
South Africa	0.506827	0.174849	0.0143494	0.0787572	0.0924114	0.132805	0.311688	0.480519	0.207792	0.214286	0.1	0	0.528571	0.142857	0.0142857
Indonesia	0.266145	0.176973	0.00470925	0.0429208	0.252021	0.257231	0.291139	0.367089	0.341772	0.252632	0.189474	0	0.326316	0.147368	0.0842105
Italy	0.257368	0.0940977	0.0227806	0.199099	0.100224	0.326431	0.258333	0.55	0.191667	0.258065	0.193548	0	0.290323	0.0725806	0.185484
Brazil	0.0967609	0.138966	0.0465141	0.0495529	0.197199	0.471007	0.333333	0.47619	0.190476	0.148148	0.185185	0.0185185	0.277778	0.111111	0.259259
Australia	0.437577	0.167192	0.0171742	0.0384926	0.0785803	0.260984	0.304527	0.440329	0.255144	0.214612	0.150685	0	0.429224	0.0958904	0.109589
France	0.0757507	0.11825	0.0336174	0.210483	0.131882	0.430016	0.248	0.512	0.24	0.207143	0.178571	0.0142857	0.342857	0.05	0.207143
Poland	0.450781	0.0562089	0.0358932	0.126677	0.106718	0.223722	0.285714	0.482143	0.232143	0.258065	0.177419	0.016129	0.33871	0.0483871	0.16129
Spain	0.180436	0.148604	0.0306354	0.101833	0.132085	0.406406	0.294118	0.447059	0.258824	0.276836	0.152542	0	0.259887	0.0508475	0.259887
Turkey	0.317983	0.0912285	0.026831	0.154683	0.18134	0.227935	0.381818	0.363636	0.254545	0.225	0.1	0.05	0.4	0.125	0.1
Netherlands	0.286876	0.133127	0.0463328	0.156908	0.168731	0.208025	0.198113	0.5	0.301887	0.134021	0.0927835	0.0412371	0.350515	0.113402	0.268041
Czech Republic	0.465904	0.0885359	0.0129289	0.109287	0.122834	0.20051	0.322581	0.516129	0.16129	0.27027	0.135135	0	0.378378	0.0810811	0.135135
Belgium	0.164252	0.095398	0.0214815	0.240193	0.200959	0.277716	0.367347	0.326531	0.306122	0.234043	0.191489	0	0.297872	0.12766	0.148936
Greece	0.405281	0.107768	0.00267642	0.0924605	0.078037	0.313777	0.25641	0.589744	0.153846	0.276596	0.191489	0	0.361702	0.0638298	0.106383
Chile	0.406757	0.113686	0.0155778	0.0705082	0.0759493	0.317521	0.319149	0.446809	0.234043	0.391304	0.282609	0	0.195652	0.0652174	0.0652174
Austria	0.112402	0.194288	0.0117338	0.122656	0.161358	0.397563	0.347222	0.416667	0.236111	0.260274	0.178082	0	0.315068	0.0821918	0.164384
Israel	0.56139	0.0473925	0	0.0115219	0.076726	0.302969	0.533333	0.4	0.0666667	0.333333	0.375	0	0.166667	0.0416667	0.0833333
Colombia	0.145406	0.163723	0.00387055	0.071592	0.175902	0.439507	0.266667	0.288889	0.444444	0.421053	0.236842	0	0.131579	0.0526316	0.157895
Finland	0.360573	0.106034	0.0334692	0.0473464	0.171827	0.280751	0.220588	0.573529	0.205882	0.191176	0.117647	0.0147059	0.279412	0.0588235	0.338235
Portugal	0.237773	0.135542	0.0276766	0.0665141	0.126302	0.406194	0.204724	0.685039	0.110236	0.198347	0.0909091	0	0.297521	0.0991736	0.31405
Hungary	0.225583	0.065256	0.0340513	0.213531	0.145134	0.316445	0.245902	0.57377	0.180328	0.25641	0.217949	0	0.358974	0.0769231	0.0897436
Sweden	0.171541	0.0779756	0.0304602	0.0452601	0.188662	0.486101	0.2	0.533333	0.266667	0.190476	0.154762	0	0.238095	0.0833333	0.333333
Denmark	0.179233	0.126915	0.0479023	0.0939679	0.122039	0.429944	0.278481	0.43038	0.291139	0.196721	0.180328	0.0163934	0.377049	0.0491803	0.180328
Switzerland	0.00974438	0.0781006	0	0.324521	0.138637	0.448997	0.226415	0.528302	0.245283	0.288889	0.0666667	0	0.244444	0.133333	0.266667
Ireland	0.248055	0.0310519	0.0179356	0.23772	0.116445	0.348792	0.186275	0.539216	0.27451	0.215517	0.146552	0.0172414	0.422414	0.0775862	0.12069
Norway	0.0322309	0.404012	0.020927	0.0402082	0.16984	0.332782	0.160714	0.660714	0.178571	0.207547	0.150943	0	0.377358	0.113208	0.150943
Slovak Republic	0.158635	0.179117	0.00782561	0.143621	0.246964	0.263838	0.285714	0.392857	0.321429	0.33871	0.225806	0.016129	0.225806	0.0645161	0.129032
New Zealand	0.114707	0.104531	0.041275	0.0483453	0.206725	0.484418	0.320988	0.37037	0.308642	0.112903	0.0483871	0	0.467742	0.0967742	0.274194
Estonia	0.584603	0.024705	0.0299652	0.0426889	0.0738784	0.244159	0.0789474	0.763158	0.157895	0.319149	0.170213	0	0.382979	0.0212766	0.106383
Slovenia	0.342982	0.00681525	0.016503	0.0673571	0.142036	0.424307	0.230769	0.615385	0.153846	0.25	0.166667	0	0.25	0	0.333333
Lithuania	0.0578642	0.150741	0.019443	0.0945291	0.11358	0.563843	0.153846	0.615385	0.230769	0.366667	0.166667	0	0.3	0.0666667	0.1
Luxembourg	0.0222504	0.004472	0.006104	0.179371	0.105149	0.682654	0.333333	0.458333	0.208333	0.229508	0.196721	0	0.377049	0.0655738	0.131148
Latvia	0.247962	0.0192406	0.0645609	0.112997	0.0935123	0.461727	0.176471	0.764706	0.0588235	0.384615	0.192308	0	0.192308	0	0.230769
Iceland	0.00238869	0	0.332211	0.00496823	0.0409564	0.619476	0	1	0	0.166667	0.166667	0	0.166667	0	0.5
MEAN	0.266559	0.117008	0.0281229	0.111854	0.141559	0.334898
MIN	0.00238869	0	0	0.00496823	0.0409564	0.0918052
TERCILE 1	0.171541	0.0912285	0.0117338	0.0673571	0.112413	0.263838
TERCILE 2	0.342982	0.138966	0.0276766	0.126677	0.163946	0.397563
TERCILE 3	0.584603	0.404012	0.332211	0.324521	0.279155	0.682654
MAX	0.584603	0.404012	0.332211	0.324521	0.279155	0.682654
